# 1 A genome-scale metabolic network model synergizes with 2 statistical learning to predict amino acid concentrations in 3 Chinese Hamster Ovary cell cultures 4

5 Song-Min Schinn<sup>1</sup>, Carly Morrison<sup>2</sup>, Wei Wei<sup>2</sup>, Lin Zhang<sup>2</sup>, Nathan E. Lewis<sup>1,3,4</sup>

6 1. Department of Pediatrics, University of California, San Diego

7 2. Pfizer, Biotherapeutics Pharmaceutical Sciences, Andover, MA

8 3. Department of Bioengineering, University of California, San Diego

9 4. Novo Nordisk Foundation Center for Biosustainability at UC San Diego  
10

## 11 Abstract

12 The control of nutrient availability is critical to large-scale manufacturing of biotherapeutics.  
13 However, the quantification of proteinogenic amino acids is time-consuming and thus is difficult  
14 to implement for real-time *in situ* bioprocess control. Genome-scale metabolic models describe  
15 the metabolic conversion from media nutrients to proliferation and recombinant protein  
16 production, and therefore are a promising platform for *in silico* monitoring and prediction of  
17 amino acid concentrations. This potential has not been realized due to unresolved challenges: (1)  
18 the models assume an optimal and highly efficient metabolism, and therefore tend to  
19 underestimate amino acid consumption, and (2) the models assume a steady state, and therefore  
20 have a short forecast range. We address these challenges by integrating machine learning with  
21 the metabolic models. Through this we demonstrate accurate and time-course dependent  
22 prediction of individual amino acid concentration in culture medium throughout the production  
23 process. Thus, these models can be deployed to control nutrient feeding to avoid premature  
24 nutrient depletion or provide early predictions of failed bioreactor runs.

## 1 Short Communication

2 Chinese Hamster Ovary (CHO) cells are widely used to manufacture complex  
3 biotherapeutic molecules at large scales. Industrial bioprocesses ensure high product yield and  
4 quality by maintaining favorable growth conditions in cell culture environments, which requires  
5 careful monitoring and control of nutrient availability. Chemically-defined serum-free media can  
6 contain dozens or >100 components<sup>1</sup>, but key nutrients include proteinogenic amino acids, which  
7 are direct substrates and regulators<sup>2,3</sup> of proliferation and protein synthesis. Unfortunately,  
8 conventional methods for amino acid quantification based on liquid chromatography and mass  
9 spectrometry are time-consuming and difficult to use for decision making and control of cell  
10 culture. Alternate spectroscopic approaches have been sensitive to a limited number of amino  
11 acid species<sup>4</sup>. Here we present a computational method to forecast time-course amino acid  
12 concentrations from routine bioprocess measurements, facilitating a timely and anticipatory  
13 control of the bioprocess (Figure 1).

14 At the foundation of our method is a genome-scale metabolic network model, which  
15 accounts for the complex conversion from media nutrients to biomass and recombinant protein  
16 production. Such models have been increasingly utilized for CHO cells<sup>5-7</sup> and bioprocess  
17 applications<sup>8,9</sup>, such as predicting clonal performances<sup>10</sup>, identifying metabolic bottlenecks<sup>11</sup>, and  
18 optimizing media formulation<sup>12,13</sup>. Metabolic network models can also estimate amino acid  
19 uptake rates necessary to experimentally support observed proliferation and productivity<sup>14</sup>.  
20 However, challenges have limited their practical application.

21 First, metabolic network models are typically highly complex but under-constrained, and  
22 therefore are easy to overfit. This is mitigated by training the model on a variety of bioprocess

1 conditions and metabolic phenotypes. Second, metabolic network models assume that cells  
2 operate at some metabolic optimum, and thus tend to describe an idealized metabolism  
3 specifically fit to the assumed objective (e.g., biomass production<sup>15,16</sup>, minimization of redox<sup>17</sup>).  
4 Third, for the present purpose, these models need to predict amino acid consumption fluxes,  
5 typically on the order of  $10^{-3}$  mmol·g<sub>DW</sub><sup>-1</sup>·hr<sup>-1</sup> (see Methods), from input data that are multiple  
6 magnitudes larger, such as growth rate and glucose consumption ( $10^{-1}$  to  $10^{-2}$  mmol·g<sub>DW</sub><sup>-1</sup>·hr<sup>-1</sup>).  
7 The preceding two challenges increase prediction error. Lastly, metabolic network models  
8 assume a steady state, which reduces the range of forecast. Typically, input data from one day  
9 are used to make predictions for the same day. However, such predictions cannot be extended to  
10 multiple days or subsequent culture phases, as cross-temporal shifts in metabolism would violate  
11 the steady state assumption. Thus, model predictions of amino acid concentrations can be overfit,  
12 ideal, and near-sighted – all of which dilutes their practicality for industrial bioprocess control.  
13 Here we demonstrate that these weaknesses can be addressed in a data-driven manner by  
14 coupling a metabolic network model with machine learning.

15 We developed this hybrid approach on a diverse set of 10 CHO clones with different  
16 growth and productivity profiles from two different fed-batch production processes. These CHO  
17 clones were subject to different bioprocess conditions and recombinant antibody identities (see  
18 Methods), resulting in a variety of phenotypes and productivity performances (Fig. S1). For  
19 example, several high-performing clones were exceptionally proliferative or productive,  
20 suggesting an efficient conversion from nutrients to biomass or recombinant protein product.  
21 Other clones performed these conversions at lower rates, suggesting attenuated metabolic  
22 activity or inefficient resource utilization. The CHO cells adjusted their nutrient uptake  
23 according to these various metabolic phenotypes, leading to diverse amino acid consumption

1 patterns (Fig, S2). For example, the consumption of glucose and serine differed by several fold  
2 across conditions and time. Furthermore, different clones varied in their consumption or  
3 secretion of key metabolites such as lactate, alanine, glycine, and glutamine.

4 We sought to predict these diverse consumption behaviors using a tailored model of CHO  
5 metabolism<sup>18</sup>. As input information, we utilized the following routinely measured industrial  
6 bioprocess data: (1) viable cell density and titer measurements, from which growth rate and  
7 specific productivity are calculated (Methods, equation 1), and (2) bioreactor concentrations of  
8 glucose, lactate, glutamate and glutamine, from which their respective consumption rates are  
9 calculated. These measurements were used as boundary conditions by constraining the fluxes of  
10 biomass production, recombinant protein synthesis and consumption of the four metabolites to  
11 observed values. Subsequently, we used Markov chain Monte Carlo sampling of metabolic  
12 fluxes<sup>19</sup> to sample the range and magnitude of all reaction fluxes to calculate the likely uptake  
13 fluxes of the remaining 18 proteinogenic amino acids (see Methods). These predictions were  
14 applied to the CHO clones across 8 days of a 12-day production run (days 4 to 11), resulting in a  
15 total of 80 individual predictions.

16 We evaluated the resulting model predictions in two ways. First, we examined the  
17 differences in model predictions and experimental measurements of amino acid uptake and  
18 secretion (Figure 2A). For most amino acids, this difference was small compared to the scale of  
19 input data, suggesting that metabolic models can describe the conversion from nutrients to  
20 biomass and recombinant proteins. Second, we examined the fold changes between model  
21 predictions and experimental measurements. These fold change errors are summarized in Figure  
22 2B by their mean and variance across the 80 observations. Overall, fold change error varied  
23 significantly across amino acids. For example, the model predicted some essential amino acids

1 consistently well – e.g. phenylalanine, cysteine and tryptophan (fold change  $\approx 1$ ), but predicted  
2 others poorly – e.g. alanine, lysine, glycine, and methionine (fold change  $\approx 0$ ). Overall, the  
3 sizeable fold change errors for many amino acids confirm the difficulty of using metabolic  
4 network models alone to predict amino acid consumption.

5 Notably, the model systematically underestimated consumption rates for almost all amino  
6 acids (fold change  $< 1$ ). This is likely because the model doesn't consider certain metabolic  
7 inefficiencies – e.g. CHO cells consume more amino acids than needed for the observed  
8 production of biomass and recombinant protein, and catabolize them as byproducts<sup>20</sup>.  
9 Furthermore, the variance of fold change error was relatively low ( $\leq 1$ ) for most amino acids.  
10 This suggests that the difference between model ideality and biological reality remained  
11 consistent across many clones and conditions.

12 We hypothesized that this consistent gap could be bridged with data and statistical  
13 modeling. We constructed a series of linear regression models to 'correct' the predictions from  
14 metabolic modeling, using growth rate and the predictions from the metabolic model as  
15 explanatory variables (Methods, equation 2). The 80 observations were randomly divided into a  
16 training dataset and validation dataset, consisting of 48 and 32 observations, respectively. The  
17 regression coefficients were first estimated from the training dataset and then applied to the  
18 validation dataset. According to validation results, the regression models substantially improved  
19 predictions, as fold change error approached unity for most amino acids (Fig. 3B). As exceptions,  
20 predictions for alanine, glycine and histidine were not reliably improved (Fig. 3, red). These  
21 results were replicated in additional validation studies involving four distinct clones  
22 (Supplementary Document).

1           These results show that our hybrid modeling approach estimates amino acid  
2 consumptions well for a small timescale of 1 day, when the steady state assumption holds true.  
3 This assumption is not valid at larger timescales of multiple days, where nutrient consumption  
4 declines asymptotically as cellular metabolism shifts from exponential growth phase to  
5 stationary phase. However, we found this limitation could be remedied by modeling the multi-  
6 phase decline in amino acid consumption with a simple sigmoid function (Methods, equation 3;  
7 line in Fig. 4), which can be fitted from only a few datapoints. Specifically, we further adapted  
8 our hybrid modeling approach by first predicting amino acid consumption rates of several early  
9 culture days as heretofore described. Then, these datapoints were used to fit a sigmoid function  
10 that described the entire consumption profile, including later culture days (Fig. 4A). Using this  
11 approach, we accurately predicted the time-course consumption rates of 13 out of 18 amino acids  
12 (Spearman  $\rho > 0.65$ ; Fig. 4B), with only few amino acids remaining difficult to predict (alanine,  
13 glycine, and histidine). Notably, our approach accurately predicted the consumption profiles of  
14 amino acids that are highly abundant in recombinant antibodies (e.g. serine, valine, and  
15 leucine)<sup>21</sup>, or that complicate media formulation due to low solubility (e.g. tyrosine). These  
16 results highlight the method's value in monitoring and forecasting the bioreactor environment.

17           In summary, the presented modeling workflow forecasted the entire amino acid  
18 consumption profile from early bioprocess measurements, facilitating anticipatory and *in situ*  
19 control of bioreactor nutrient availability. This was realized by a novel combination of metabolic  
20 and statistical models. A metabolic network model estimated amino acid uptake rates necessary  
21 for observed proliferation and productivity, assuming an ideally efficient metabolism and steady  
22 state conditions. Two subsequent regression models refined these predictions by offsetting  
23 prediction errors empirically and by describing the time-course relationship of individual

1 predictions. Our efforts are part of a growing trend of synergizing metabolic network models  
2 with machine learning methods<sup>22</sup>, and demonstrates the power of hybrid modeling for on-line  
3 control of bioprocesses.

4

## 5 **Methods**

### 6 **Cell culture experiments**

7 Two production fed batch processes were used, Fed batch 1 and Fed batch 2. Both fed  
8 batch processes used chemically defined media and feeds over the 12-day cell culture. Fed batch  
9 1 used a glucose restricted fed batch process called HiPDOG<sup>23</sup>. Glucose concentration is kept  
10 low during the initial phase of the process, Day 2-7, through intermittent addition of feed  
11 medium containing glucose at the high end of pH dead-band and then glucose was maintained  
12 above 1.5 g/L thereafter. These conditions help restrict lactate production in fed batch cultures  
13 without compromising the proliferative capability of cells. In Fed batch 2 a conventional cell  
14 culture process was used where glucose was maintained above 1.5 g/L throughout the process.

15 For both process conditions, bioreactor vessels were inoculated at  $2 \times 10^6$  viable cells/mL.  
16 The following bioprocess characteristics were quantified daily using a NOVA Flex BioProfile  
17 Analyzer (Nova Biomedical, Waltham, MA): viable cell density, average live cell diameter and  
18 concentrations of glucose, lactate, glutamate, and glutamine. Viable cell density data were  
19 converted to growth rates by following equation to be compared to model-predicted growth rates.

20

$$(1) \text{ Growth rate} = \frac{1}{vcd} \cdot \frac{\Delta vcd}{\Delta time}$$

1 Flash-frozen cell pellets ( $10^6$  cells) and supernatant (1 mL) were collected from  
2 bioreactor runs for each sampling day. Collected samples were sent to Metabolon (Metabolon  
3 Inc, Morrisville, NC) for metabolomics analyses. Proteins were removed by methanol  
4 precipitation and the metabolites were recovered by vigorous shaking and centrifugation. The  
5 extracted samples were run for reverse-phase Ultrahigh Performance Liquid Chromatography-  
6 Tandem Mass Spectrometry with negative ion mode ESI. Raw data was extracted, peak-  
7 identified and processed for quality control using Metabolon's hardware and software. The raw  
8 ion count data was normalized against the extracted proteins quantified using a Bradford assay.  
9 These measurements were used as input data to the model by converting their units to model  
10 units of mmol per gram of dry weight of cell per hour.

11

## 12 **Metabolic network modeling**

13 We used a previously described metabolic network model that is tailored to the  
14 investigated CHO clones<sup>18</sup>. Experimental measurements for clone and culture day were used to  
15 constrain model reactions for biomass production, monoclonal antibody secretion and  
16 consumption of glucose, lactate, glutamate, and glutamine. Then, we computed distributions of  
17 likely amino acid consumption rates by stochastically sampling 5000 points within the model's  
18 solution space via a Markov chain Monte Carlo sampling algorithm, as described previously<sup>24,25</sup>,  
19 using *optGpSampler*<sup>25</sup> and COBRAPy<sup>26</sup>. A set of non-uniform 'points' or flux values was  
20 generated within the feasible flux space. Each point was subsequently moved randomly, while  
21 remaining within the feasible flux space. To do this, a random direction was first chosen. Second,  
22 the limit for how far the point can travel in the randomly-chosen direction was calculated. Lastly,  
23 a new random point on this line was selected. This process was iterated until the set of points



1 approached a uniform sample of the solution space. Upon completion, the sampled distributions'  
2 statistical features were noted – that is, their mean, median, standard deviation, 25 percentile, and  
3 75 percentile values.

4

## 5 **Statistical methods**

6 For each amino acid, the mean of the sample distribution was interpreted as the likely  
7 consumption rates. These predicted consumption rates deviated from experimental observations  
8 by a consistent fold amount. Fold change error was also correlated with culture day, as the model  
9 predicted the exponential growth phase better than the subsequent stationary phase. Therefore,  
10 the model predictions were refined by a regression model as follows, with growth rate and the  
11 predictions themselves as explanatory variables.

$$12 \quad (2) \text{ Corrected prediction} = \beta_0 + \beta_1 \cdot \text{prediction} + \beta_2 \cdot \text{growth rate}$$

13 The time-course amino acid consumption profiles were described mathematically by the  
14 Monod equation, as follows:

$$15 \quad (3) \text{ Consumption rate} = \beta_0 \cdot \frac{\text{time}}{\beta_1 + \text{time}}$$

16 Here,  $\beta_0$  represents the minimum consumption rate which the cells asymptotically  
17 approach during later stationary phase. The variable  $\beta_1$  is the half-velocity constant, or the time  
18 point at which the consumption rate reaches half of  $\beta_0$ . These analyses were carried out and  
19 visualized using COBRA Toolbox 2.0<sup>19</sup> in MATLAB R2018b (MathWorks; Natick,  
20 Massachusetts, USA)

## 1 References

- 2 1. Ritacco FV, Wu Y, Khetan A. Cell culture media for recombinant protein expression in  
3 Chinese hamster ovary (CHO) cells: History, key components, and optimization strategies.  
4 *Biotechnology Progress*. 2018;34(6):1407-1426. doi:10.1002/btpr.2706
- 5 2. Duarte TM, Carinhas N, Barreiro LC, Carrondo MJT, Alves PM, Teixeira AP. Metabolic  
6 responses of CHO cells to limitation of key amino acids. *Biotechnology and Bioengineering*.  
7 2014;111(10):2095-2106. doi:10.1002/bit.25266
- 8 3. Fomina Y, Yadlin D, Gosink JJ, McCoy R, et al. Cellular responses to individual amino-acid  
9 depletion in antibody-expressing and parental CHO cell lines. *Biotechnology and*  
10 *Bioengineering*. 2014;111(5):965-979. doi:10.1002/bit.25155
- 11 4. Bhatia H, Mehdizadeh H, Drapeau D, Yoon S. In-line monitoring of amino acids in  
12 mammalian cell cultures using raman spectroscopy and multivariate chemometrics models.  
13 *Engineering in Life Sciences*. 2018;18(1):55-61. doi:10.1002/elsc.201700084
- 14 5. Hefzi H, Ang KS, Hanscho M, et al. A Consensus Genome-scale Reconstruction of Chinese  
15 Hamster Ovary Cell Metabolism. *Cell Systems*. 2016;3(5):434-443.e8.  
16 doi:10.1016/j.cels.2016.10.020
- 17 6. Calmels C, McCann A, Malphettes L, Andersen MR. Application of a curated genome-  
18 scale metabolic model of CHO DG44 to an industrial fed-batch process. *Metab Eng*.  
19 2019;51:9-19. doi:10.1016/j.ymben.2018.09.009
- 20 7. Huang Z, Yoon S. Integration of Time-Series Transcriptomic Data with Genome-Scale  
21 CHO Metabolic Models for mAb Engineering. *Processes*. 2020;8(3):331.  
22 doi:10.3390/pr8030331
- 23 8. Zhang C, Hua Q. Applications of Genome-Scale Metabolic Models in Biotechnology and  
24 Systems Medicine. *Front Physiol*. 2016;6. doi:10.3389/fphys.2015.00413
- 25 9. Sommeregger W, Sissolak B, Kandra K, von Stosch M, Mayer M, Striedner G. Quality by  
26 control: Towards model predictive control of mammalian cell culture bioprocesses.  
27 *Biotechnol J*. 2017;12(7). doi:10.1002/biot.201600546
- 28 10. Popp O, Müller D, Didzus K, et al. A hybrid approach identifies metabolic signatures of  
29 high-producers for chinese hamster ovary clone selection and process optimization.  
30 *Biotechnology and Bioengineering*. 2016;113(9):2005-2019. doi:10.1002/bit.25958
- 31 11. Zhuangrong H, Seongkyu Y. Identifying metabolic features and engineering targets for  
32 productivity improvement in CHO cells by integrated transcriptomics and genome-scale  
33 metabolic model. *Biochemical Engineering Journal*. Published online May 5, 2020:107624.  
34 doi:10.1016/j.bej.2020.107624

- 1 12. Fouladiha H, Marashi S-A, Torkashvand F, Mahboudi F, Lewis NE, Vaziri B. A metabolic  
2 network-based approach for developing feeding strategies for CHO cells to increase  
3 monoclonal antibody production. *bioRxiv*. Published online 2020:751347.  
4 doi:10.1101/751347
- 5 13. Traustason B, Cheeks M, Dikicioglu D. Computer-Aided Strategies for Determining the  
6 Amino Acid Composition of Medium for Chinese Hamster Ovary Cell-Based  
7 Biomanufacturing Platforms. *International Journal of Molecular Sciences*.  
8 2019;20(21):5464. doi:10.3390/ijms20215464
- 9 14. Chen Y, McConnell BO, Gayatri Dhara V, et al. An unconventional uptake rate objective  
10 function approach enhances applicability of genome-scale models for mammalian cells.  
11 *NPJ Syst Biol Appl*. 2019;5. doi:10.1038/s41540-019-0103-6
- 12 15. Feist AM, Palsson BO. The biomass objective function. *Curr Opin Microbiol*.  
13 2010;13(3):344-349. doi:10.1016/j.mib.2010.03.003
- 14 16. Szeliiova D, Ruckerbauer D, Galleguillos S, et al. What CHO is made of: Variations in the  
15 biomass composition of Chinese hamster ovary cell lines. *Metabolic Engineering*.  
16 Published online 2020.
- 17 17. Savinell JM, Palsson BO. Network analysis of intermediary metabolism using linear  
18 optimization. I. Development of mathematical formalism. *J Theor Biol*. 1992;154(4):421-  
19 454. doi:10.1016/s0022-5193(05)80161-4
- 20 18. Schinn S-M, Morrison C, Wei W, Zhang L, Lewis N. Systematic evaluation of  
21 parameterization for genome-scale metabolic models of cultured mammalian cells.  
22 Published online 2020.
- 23 19. Schellenberger J, Que R, Fleming RMT, et al. Quantitative prediction of cellular  
24 metabolism with constraint-based models: the COBRA Toolbox v2.0. *Nat Protoc*.  
25 2011;6(9):1290-1307. doi:10.1038/nprot.2011.308
- 26 20. Mulukutla BC, Kale J, Kalomeris T, Jacobs M, Hiller GW. Identification and control of  
27 novel growth inhibitors in fed-batch cultures of Chinese hamster ovary cells. *Biotechnology  
28 and Bioengineering*. 2017;114(8):1779-1790. doi:10.1002/bit.26313
- 29 21. Fan Y, Val IJD, Müller C, et al. Amino acid and glucose metabolism in fed-batch CHO cell  
30 culture affects antibody production and glycosylation. *Biotechnology and Bioengineering*.  
31 2015;112(3):521-535. doi:10.1002/bit.25450
- 32 22. Zampieri G, Vijayakumar S, Yaneske E, Angione C. Machine and deep learning meet  
33 genome-scale metabolic modeling. *PLoS Comput Biol*. 2019;15(7).  
34 doi:10.1371/journal.pcbi.1007084
- 35 23. Gagnon M, Hiller G, Luan Y-T, Kittredge A, DeFelice J, Drapeau D. High-End pH-  
36 controlled delivery of glucose effectively suppresses lactate accumulation in CHO Fed-

- 1 batch cultures. *Biotechnology and Bioengineering*. 2011;108(6):1328-1337.  
2 doi:10.1002/bit.23072
- 3 24. Nam H, Lewis NE, Lerman JA, et al. Network Context and Selection in the Evolution to  
4 Enzyme Specificity. *Science*. 2012;337(6098):1101-1104. doi:10.1126/science.1216861
- 5 25. Megchelenbrink W, Huynen M, Marchiori E. optGpSampler: An Improved Tool for  
6 Uniformly Sampling the Solution-Space of Genome-Scale Metabolic Networks. *PLOS*  
7 *ONE*. 2014;9(2):e86587. doi:10.1371/journal.pone.0086587
- 8 26. Ebrahim A, Lerman JA, Palsson BO, Hyduke DR. COBRApy: CONstraints-Based  
9 Reconstruction and Analysis for Python. *BMC Systems Biology*. 2013;7(1):74.  
10 doi:10.1186/1752-0509-7-74
- 11
- 12

# 1 Figures

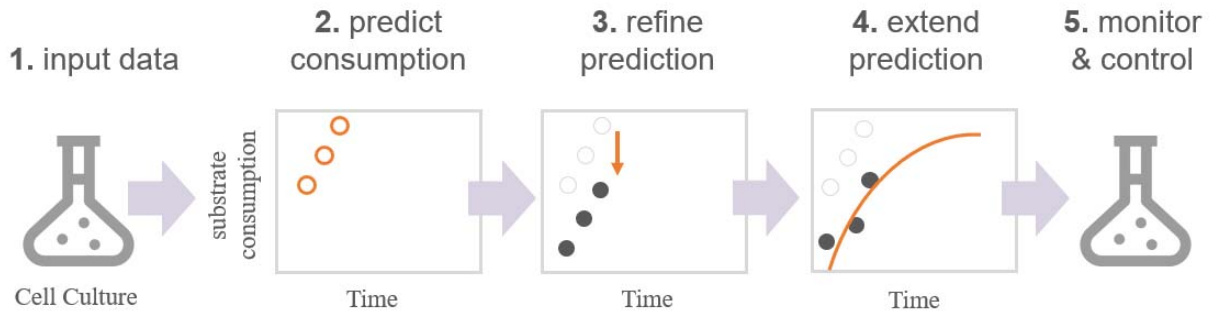

2

3 **Figure 1: Overview of method.** A novel combination of a metabolic and statistical models forecast the time-course amino acid  
4 consumption profiles in CHO cell cultures, as follows: (1) Routine bioprocess measurements are used as input data. (2) A  
5 metabolic model initially estimates early amino acid consumption rates.(3) A regression model refines these predictions. (4)  
6 These refined predictions are fit to a curve describing the time-course profile. (5) This would allow for anticipatory control of  
7 amino acid availability in bioreactors.

8

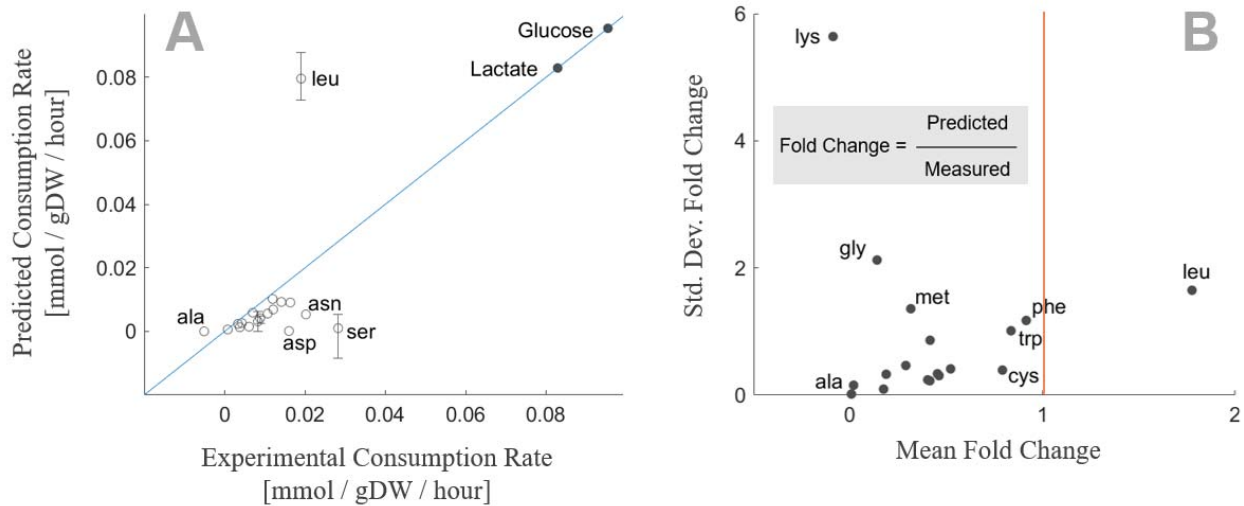

9

10 **Figure 2: Metabolic network model shows moderate accuracy in estimating amino acid consumption.** (a) Model predictions  
11 compared well to experimental observations, given the scale of input data such as the consumption rates of glucose and lactate  
12 (upper right, filled circles). (b) The fold change of model predictions and experimental measurements was also explored. The  
13 mean and variance of fold change across all 10 clones and 8 timepoints are shown. Prediction accuracy was particularly good for  
14 phenylalanine, tryptophan and cysteine, whose fold change approached unity (red line, x-axis). However, for many amino acids,  
15 model predictions were prone to significant fold change errors. Notably, the relatively low variance in fold change error (y-axis)  
16 suggests that predictions could be improved empirically.

1

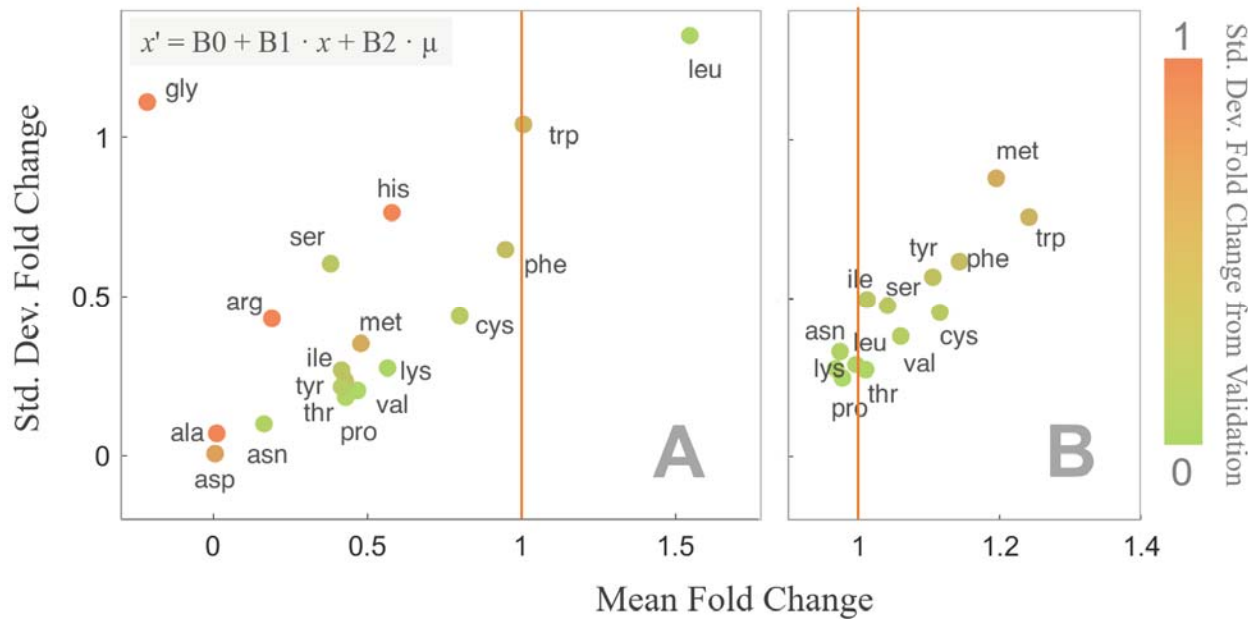

2

3 **Figure 3: Statistical learning refines predictions of the metabolic model.** A regression model was devised for each amino acid.  
 4 The variables  $\mu$ ,  $x$ , and  $x'$  represent growth rate, predicted consumption rate and revised consumption rate, respectively. The  
 5 regression coefficients were fitted from the training dataset. (a) Here we show the prediction qualities by fold change for a  
 6 validation dataset *before* refinement by regression. The mean and variance of fold changes are comparable to the entire dataset  
 7 (Figure 2b). (b) The prediction values were transformed by the regression model. Prediction of nearly all amino acids approach  
 8 unity (red line). The datapoints are colored by the variance in fold change after transformation. Amino acids with high variance in  
 9 fold change ( $y \geq 1$ , red) – alanine, glycine, arginine and histidine – failed to be reliably corrected by the regression model.

10

11

12

13

1

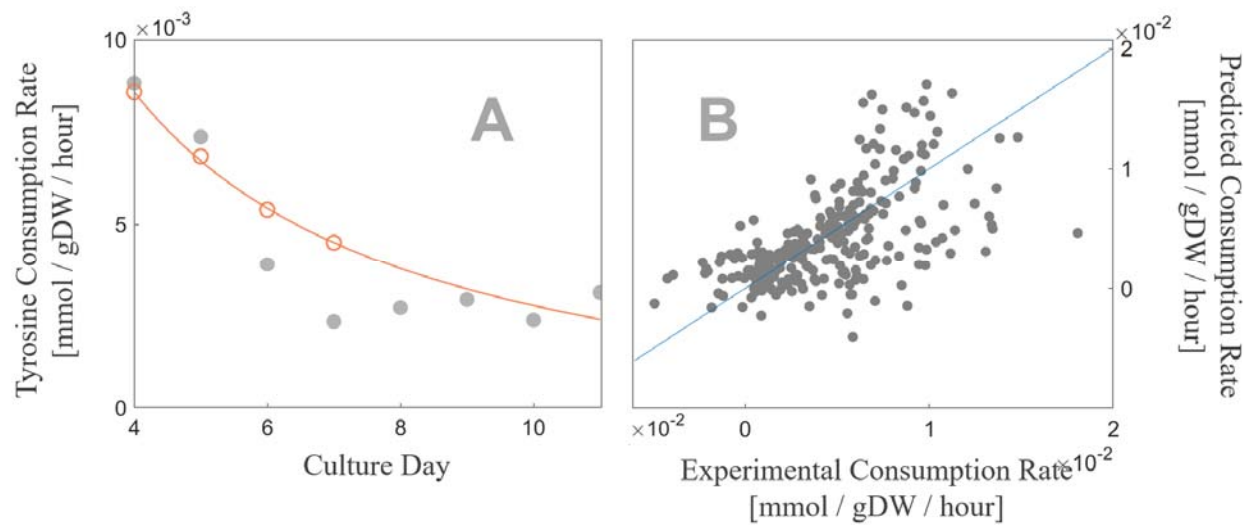

2

3 **Figure 4: Curve fitting forecasts amino acid profiles.** (A) Bioprocess data from days 4-7 are used to estimate tyrosine  
4 consumption rates (empty circles). These estimations are used to parameterize a sigmoid curve (line; see Methods, equation 3)  
5 that describes the consumption profile for the entire culture duration. This predicted time-course consumption profile agreed well  
6 with experimental measurements (filled circle). Time-course profiles of other amino acids are provided in Supplementary Figures.  
7 (B) Overall, model predictions and experimental measurements agreed fairly well for all amino acids (Spearman  $\rho = 0.54$ ).

8
